# Supplementary material for: Physiological and ecological tipping points caused by ocean acidification
Source: Copernicus journal article supplement (doi:10.5194/esd-2023-24), 2023-09-04
Supplement: Supplementary file [file esd-2023-24-AC3-supplement.pdf]

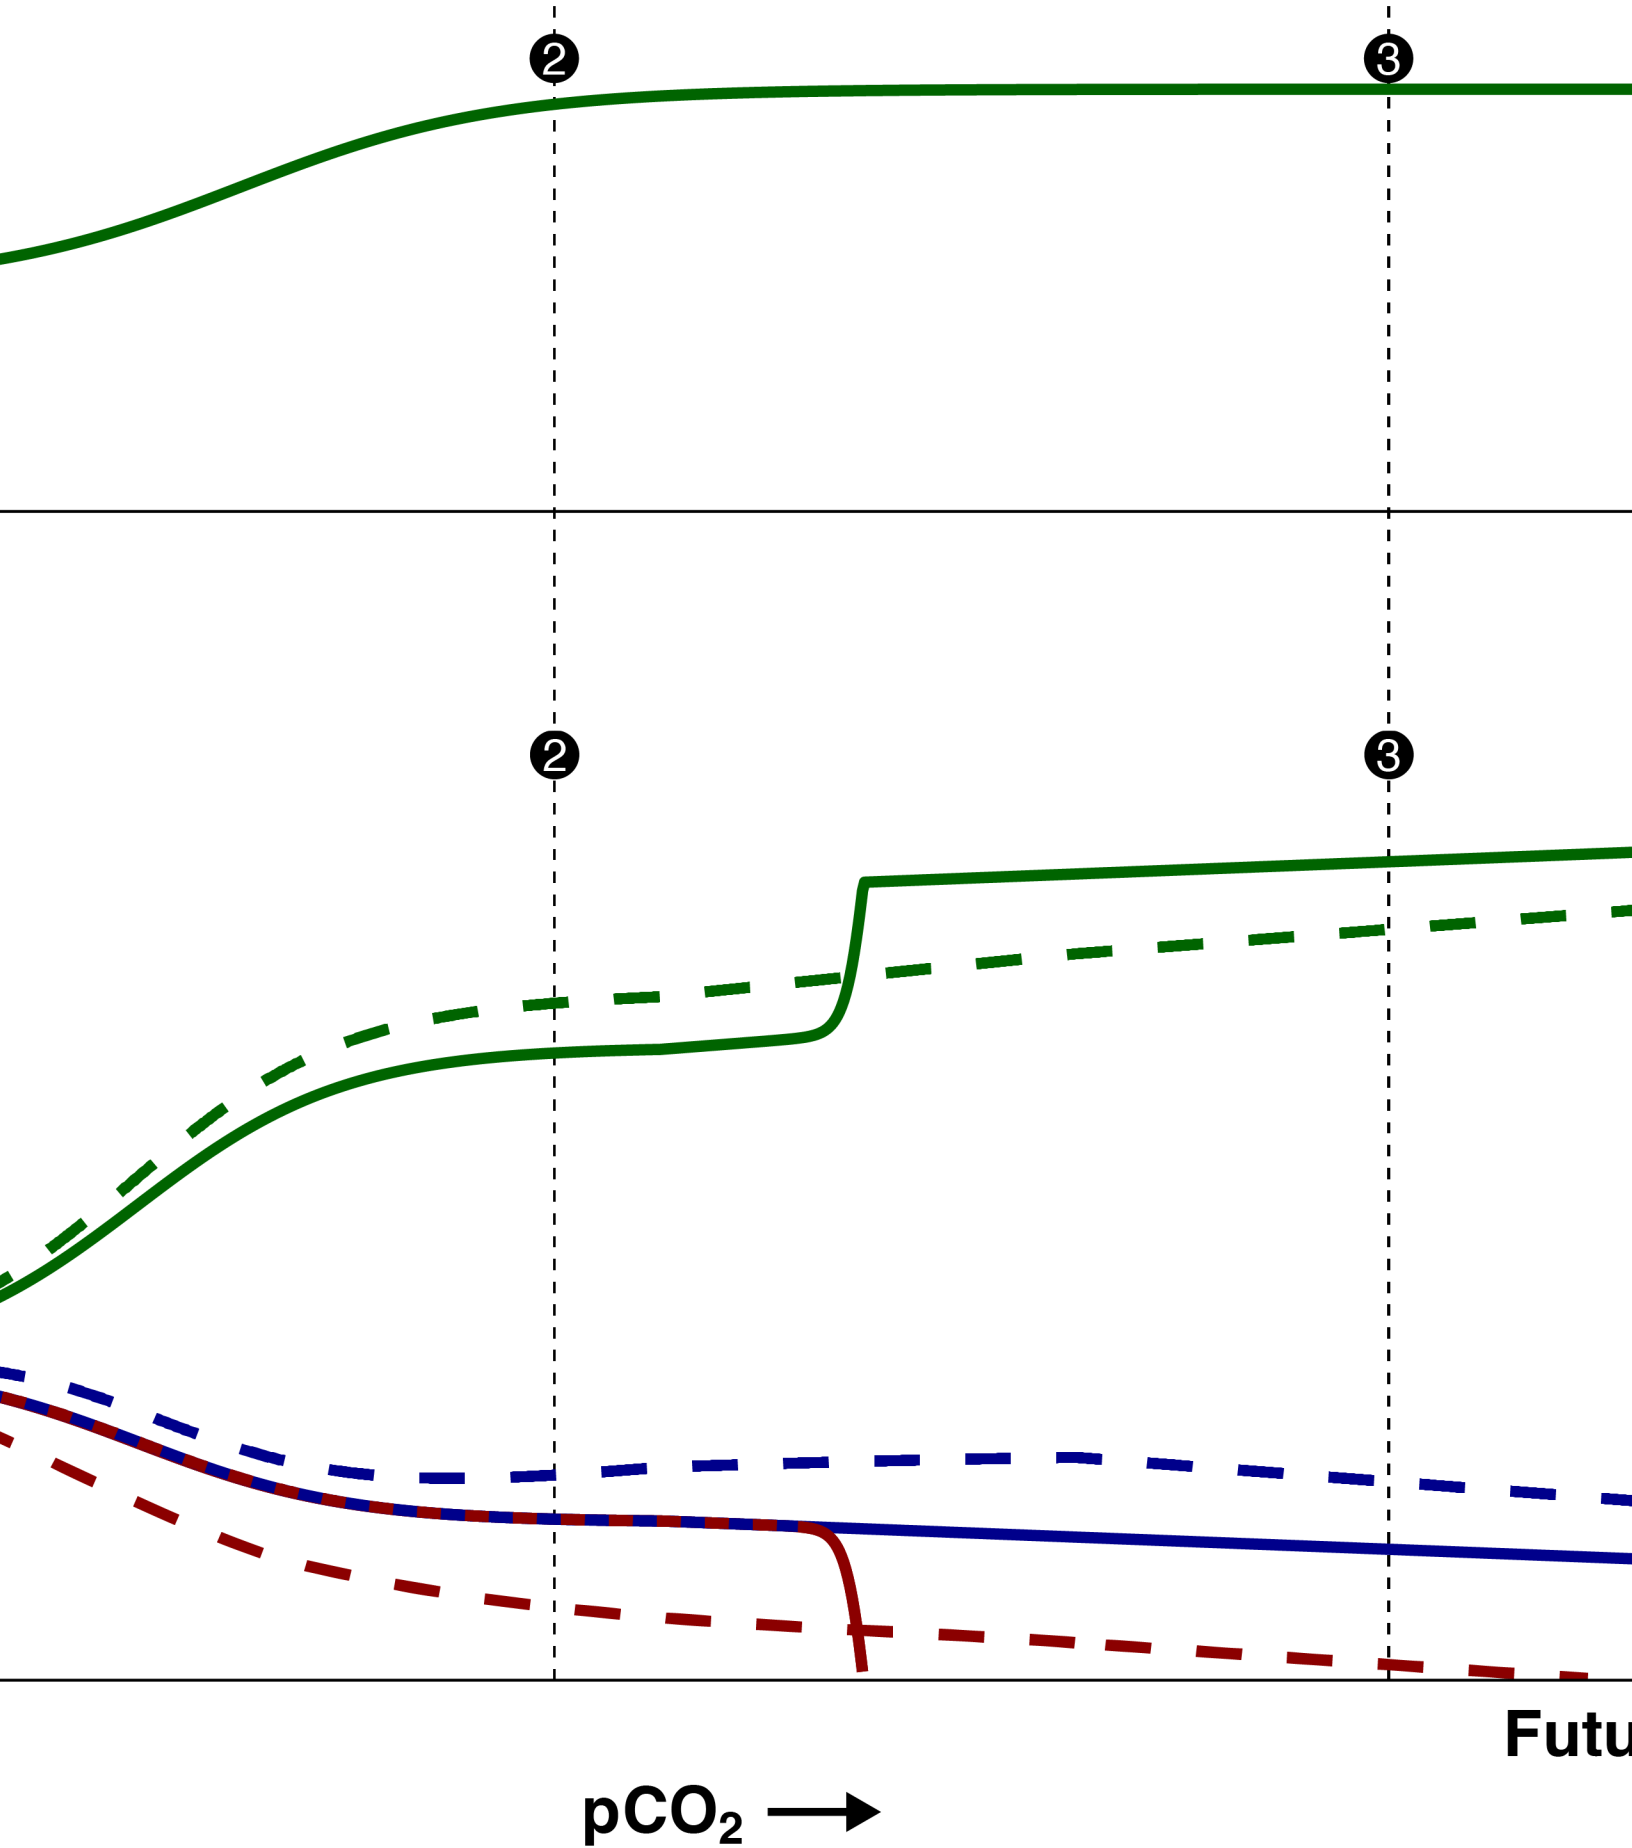

ities 

**2** Near Future Communities 

**3** Future
